# Supplementary material
Source: PubMed Central journal article supplement (PMC7351429)
Supplement: mmc1.pdf [file mmc1.pdf]

**Appendix**  
**Associations Between Media Exposure and Mental Distress**  
**Among U.S. Adults at the Beginning of the COVID-19 Pandemic**  
**Riehm et al.**

**Appendix Table 1.** Adjusted Associations Between Media Exposure and Mental Distress Among U.S. Adults in the UAS230 Panel, March 10 to March 31, 2020 (n=6,329)

| Variable                                                                 | Unadjusted<br>OR (95% CI) | Adjusted<br>OR (95% CI)  |
|--------------------------------------------------------------------------|---------------------------|--------------------------|
| Average time spent on social media per day, hours                        | <b>1.28 (1.21, 1.36)</b>  | <b>1.14 (1.06, 1.23)</b> |
| Number of traditional media sources consulted                            | <b>1.10 (1.05, 1.16)</b>  | <b>1.15 (1.09, 1.22)</b> |
| Days since March 10, 2020                                                | –                         | <b>1.02 (1.01, 1.04)</b> |
| Age, years                                                               | –                         | <b>0.99 (0.98, 0.99)</b> |
| <b>Sex</b>                                                               |                           |                          |
| Male                                                                     | –                         | ref                      |
| Female                                                                   | –                         | 1.14 (0.96, 1.35)        |
| <b>Race/Ethnicity</b>                                                    |                           |                          |
| White                                                                    | –                         | ref                      |
| American Indian/Alaska Native                                            | –                         | <b>0.19 (0.05, 0.71)</b> |
| Asian                                                                    | –                         | 0.76 (0.50, 1.17)        |
| Black/African American                                                   | –                         | <b>0.56 (0.40, 0.77)</b> |
| Hawaiian/Pacific Islander                                                | –                         | 0.43 (0.11, 1.64)        |
| Hispanic/Latinx                                                          | –                         | 0.84 (0.64, 1.11)        |
| Multiracial                                                              | –                         | 0.97 (0.60, 1.58)        |
| <b>Marital status</b>                                                    |                           |                          |
| Married                                                                  | –                         | ref                      |
| Never married                                                            | –                         | 1.11 (0.90, 1.37)        |
| Separated or divorced                                                    | –                         | <b>1.34 (1.05, 1.71)</b> |
| Widowed                                                                  | –                         | 0.99 (0.66, 1.49)        |
| <b>Education</b>                                                         |                           |                          |
| Less than high school                                                    | –                         | ref                      |
| Some college/2-year degree                                               | –                         | 0.88 (0.72, 1.08)        |
| Bachelor's                                                               | –                         | 1.15 (0.91, 1.46)        |
| Graduate                                                                 | –                         | 1.09 (0.83, 1.43)        |
| <b>Household income</b>                                                  |                           |                          |
| <\$20,000                                                                | –                         | ref                      |
| \$20,000–\$39,999                                                        | –                         | 0.88 (0.66, 1.17)        |
| \$40,000–\$59,999                                                        | –                         | 0.90 (0.67, 1.22)        |
| \$60,000–\$99,999                                                        | –                         | 0.79 (0.59, 1.06)        |
| ≥\$100,000                                                               | –                         | 0.85 (0.61, 1.17)        |
| <b>Currently have job</b>                                                |                           |                          |
| No                                                                       | –                         | ref                      |
| Yes                                                                      | –                         | 0.91 (0.75, 1.11)        |
| <b>Prior depressive symptoms</b>                                         |                           |                          |
| Any prior emotional, nervous, or psychiatric conditions                  | –                         | <b>1.34 (1.28, 1.39)</b> |
| No                                                                       | –                         | ref                      |
| Yes                                                                      | –                         | <b>1.86 (1.55, 2.24)</b> |
| Perceived chance of being infected with coronavirus in the next 3 months | –                         | <b>1.01 (1.01, 1.01)</b> |

**Appendix**  
**Associations Between Media Exposure and Mental Distress**  
**Among U.S. Adults at the Beginning of the COVID-19 Pandemic**  
**Riehm et al.**

---

|                                                                             |   |                          |
|-----------------------------------------------------------------------------|---|--------------------------|
| Perceived chance of having no money due to coronavirus in the next 3 months | – | <b>1.01 (1.01, 1.01)</b> |
|-----------------------------------------------------------------------------|---|--------------------------|

---

*Notes:* Bold font indicates statistically significant association ( $p < 0.05$ ).

UAS230, Understanding America Study.

**Appendix**  
**Associations Between Media Exposure and Mental Distress**  
**Among U.S. Adults at the Beginning of the COVID-19 Pandemic**  
**Riehm et al.**

**Appendix Figure 1.** Proportions and 95% CIs of participants in each category of mental distress, by date of survey completion, among U.S. adults in the UAS230 Panel, March 10 to March 31, 2020 (n=6,329).

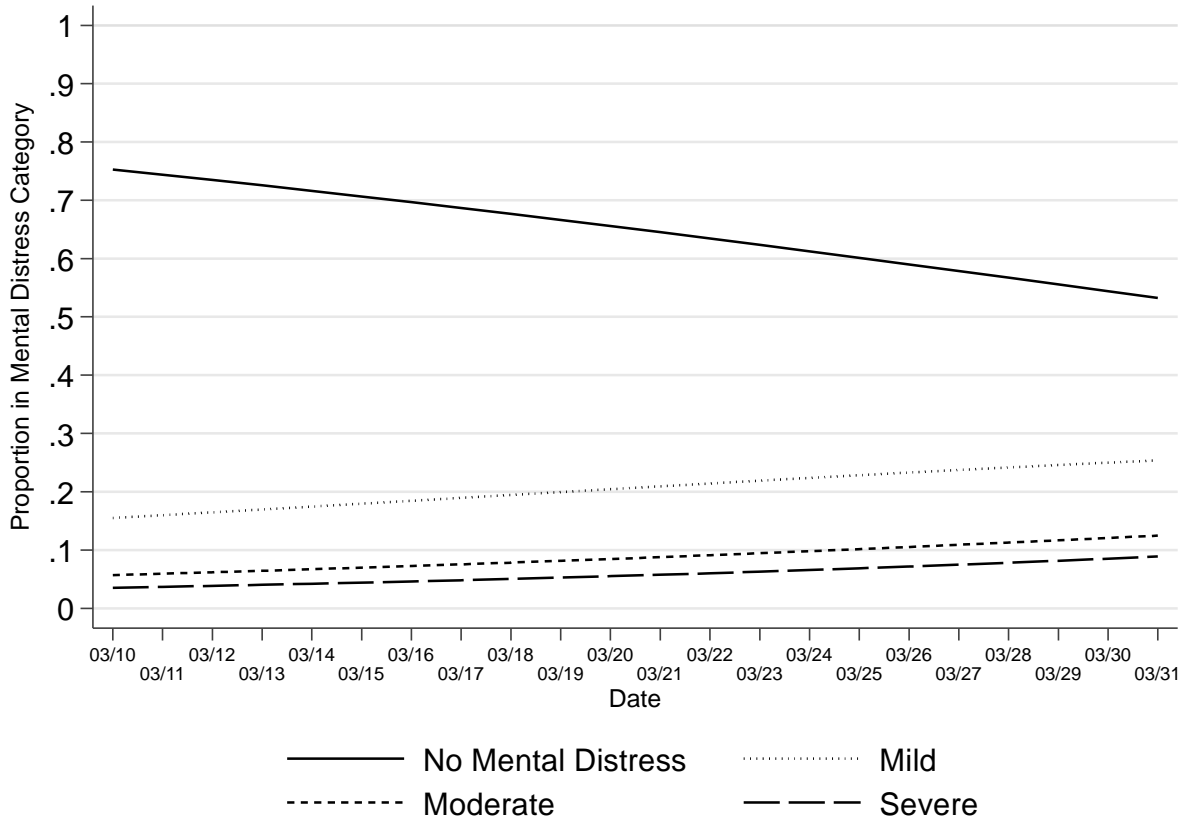

**Appendix**  
**Associations Between Media Exposure and Mental Distress**  
**Among U.S. Adults at the Beginning of the COVID-19 Pandemic**  
**Riehm et al.**

**Appendix Table 2.** Predicted Proportion of Participants With Each Level of Mental Distress and 95% CIs for Different Values of Time Spent on Social Media and Number of Traditional Media Sources Consulted to Learn About COVID-19, Among U.S. Adults in the UAS230 Panel, March 10 to March 31, 2020 (n=6,329)

| Variable                                                 | Proportions (95% CI) |                   |                   |                   |
|----------------------------------------------------------|----------------------|-------------------|-------------------|-------------------|
|                                                          | None                 | Mild              | Moderate          | Severe            |
| <b>Average time spent on social media per day, hours</b> |                      |                   |                   |                   |
| 0                                                        | 0.73 (0.71, 0.75)    | 0.17 (0.15, 0.18) | 0.06 (0.05, 0.07) | 0.04 (0.03, 0.05) |
| 0.5                                                      | 0.72 (0.71, 0.74)    | 0.17 (0.16, 0.18) | 0.06 (0.06, 0.07) | 0.04 (0.03, 0.05) |
| 1                                                        | 0.71 (0.70, 0.73)    | 0.18 (0.16, 0.19) | 0.07 (0.06, 0.08) | 0.04 (0.04, 0.05) |
| 1.5                                                      | 0.70 (0.69, 0.72)    | 0.18 (0.17, 0.20) | 0.07 (0.06, 0.08) | 0.05 (0.04, 0.05) |
| 2                                                        | 0.69 (0.67, 0.71)    | 0.19 (0.17, 0.20) | 0.07 (0.06, 0.08) | 0.05 (0.04, 0.06) |
| 2.5                                                      | 0.68 (0.65, 0.70)    | 0.19 (0.17, 0.21) | 0.08 (0.07, 0.09) | 0.05 (0.04, 0.06) |
| 3                                                        | 0.67 (0.64, 0.70)    | 0.20 (0.18, 0.22) | 0.08 (0.07, 0.09) | 0.05 (0.04, 0.06) |
| 3.5                                                      | 0.66 (0.62, 0.69)    | 0.20 (0.18, 0.23) | 0.08 (0.07, 0.10) | 0.06 (0.05, 0.07) |
| 4                                                        | 0.64 (0.60, 0.69)    | 0.21 (0.18, 0.23) | 0.09 (0.07, 0.10) | 0.06 (0.05, 0.07) |
| <b>Number of traditional media sources consulted</b>     |                      |                   |                   |                   |
| 0                                                        | 0.77 (0.74, 0.79)    | 0.15 (0.13, 0.16) | 0.05 (0.04, 0.06) | 0.03 (0.03, 0.04) |
| 1                                                        | 0.75 (0.73, 0.77)    | 0.16 (0.14, 0.17) | 0.06 (0.05, 0.07) | 0.04 (0.03, 0.04) |
| 2                                                        | 0.73 (0.71, 0.74)    | 0.17 (0.16, 0.18) | 0.06 (0.06, 0.07) | 0.04 (0.03, 0.05) |
| 3                                                        | 0.70 (0.69, 0.72)    | 0.18 (0.17, 0.19) | 0.07 (0.06, 0.08) | 0.05 (0.04, 0.05) |
| 4                                                        | 0.68 (0.66, 0.70)    | 0.19 (0.18, 0.21) | 0.08 (0.07, 0.09) | 0.05 (0.04, 0.06) |
| 5                                                        | 0.65 (0.62, 0.68)    | 0.20 (0.18, 0.22) | 0.08 (0.07, 0.10) | 0.06 (0.05, 0.07) |

*Notes:* Predictions are based on the adjusted model. Proportions sum to 1 in each row across columns. All other covariates are set to their observed values.

UAS230, Understanding America Study.
